# Supplementary material for: Li3Ba4Sc3(BO3)4(B2O5)2: featuring the coexistence of isolated BO3and B2O5units
Source: Royal Society of Chemistry journal article supplement (doi:10.1039/c9nj02710f), 2019-01-01
Supplement: c9nj02710f1.pdf [file c9nj02710f1.pdf]

## **$\text{Li}_3\text{Ba}_4\text{Sc}_3(\text{BO}_3)_4(\text{B}_2\text{O}_5)_2$ : featuring the coexistence of isolated $\text{BO}_3$ and $\text{B}_2\text{O}_5$ units**

Xianghe Meng,<sup>a,b</sup> Mingjun Xia,<sup>a,b</sup> and Rukang Li<sup>\*,a,b</sup>

<sup>a</sup> Beijing Center for Crystal Research and Development, Key Laboratory of Functional Crystals and Laser Technology, Technical Institute of Physics and Chemistry, Chinese Academy of Sciences, Beijing 100190, China

<sup>b</sup> University of Chinese Academy of Sciences, Beijing 100190, China

## **Experiment section**

### **Reagents**

All of the starting reagents, i.e.,  $\text{Li}_2\text{CO}_3$ ,  $\text{BaCO}_3$ ,  $\text{Sc}_2\text{O}_3$ ,  $\text{LiF}$ ,  $\text{NaF}$  and  $\text{B}_2\text{O}_3$ , were of analytical grade and used without further purification.

### **Synthesis of Polycrystalline**

$\text{Li}_2\text{CO}_3$ ,  $\text{BaCO}_3$ ,  $\text{Sc}_2\text{O}_3$ , and  $\text{B}_2\text{O}_3$  were fully mixed and grind with a molar ratio of  $\text{Li}_2\text{CO}_3$ :  $\text{BaCO}_3$ :  $\text{Sc}_2\text{O}_3$ :  $\text{B}_2\text{O}_3$ =1.5: 4:1.5:4. Then, the mixture was gradually heated to 723K at the rate of 50K/h from room temperature with several intermediate grindings and continued to heat up to 1053K in 24h and sintered at that temperature for 12h.

### **Crystal Growth**

Colorless rod-like single crystals of LBSBO were successfully obtained from  $\text{LiF}$ - $\text{NaF}$ - $\text{B}_2\text{O}_3$  flux with molar ratio of LBSBO:  $\text{LiF}$ :  $\text{NaF}$ :  $\text{B}_2\text{O}_3$ =1:3:2:2. After weighing the corresponding reactants according to the above proportion, the mixture was ground in a mortar and then transferred to a  $\phi 10 \times 20$  platinum crucible. Afterward, the platinum crucible was heated in a crystal growth furnace at a rate of 50K/h from room temperature to 1223K and hold at this temperature for 24h. After that, the high-temperature melt was cooled to 923K at a cooling rate of 1K/h, followed by rapid cooling to room temperature at a rate of 25K/h.

### **Powder X-ray Diffraction (PXRD)**

PXRD data of LBSBO was collected on Bruker D8 Focus diffractometer equipped with  $\text{Cu K}\alpha$  radiation ( $\lambda=1.5418\text{\AA}$ ) in the  $2\theta$  range of  $5\text{-}70^\circ$  at room temperature.

### **Single-Crystal Structure Determination**

The diffraction data were collected on a Rigaku Oxford Diffraction single-crystal diffractometer equipped with graphite-monochromated Mo K $\alpha$  radiation ( $\lambda = 0.71073$  Å) at 293 K. The crystal structures were solved by direct methods with the program SHELXS-97 and refined by full-matrix least squares on F<sup>2</sup> by SHELXL-97 programs.<sup>1</sup> The structures were verified using the ADDSYM algorithm from the program PLATON, and no higher symmetry was discovered. The relevant crystallographic data are presented in **Table S1**. Additional crystallographic information is provided in **Table S2-S4**.

#### **Thermal analysis.**

The differential scanning calorimetry (DSC) analysis was performed on NETZSCH STA 409 CD thermal analyzer under N<sub>2</sub> flow with a sample heating rate of 20 °C/min from room temperature to 1000 °C.

#### **UV-Vis-Near-IR (NIR) Diffuse-Reflectance Spectrum.**

The reflectance spectra were measured in the range of 200-2000 nm by Cary 7000 UV-VIS-NIR Universal Measurement Spectrophotometer. BaSO<sub>4</sub> was employed as the 100% reflectance standard.

#### **Infrared spectra**

Infrared spectroscopy of LBSBO were collected on a Varian Excalibur 3100 spectrometer in air from 400 cm<sup>-1</sup> to 1500 cm<sup>-1</sup> to clarify the coordination environment of the boron atoms.

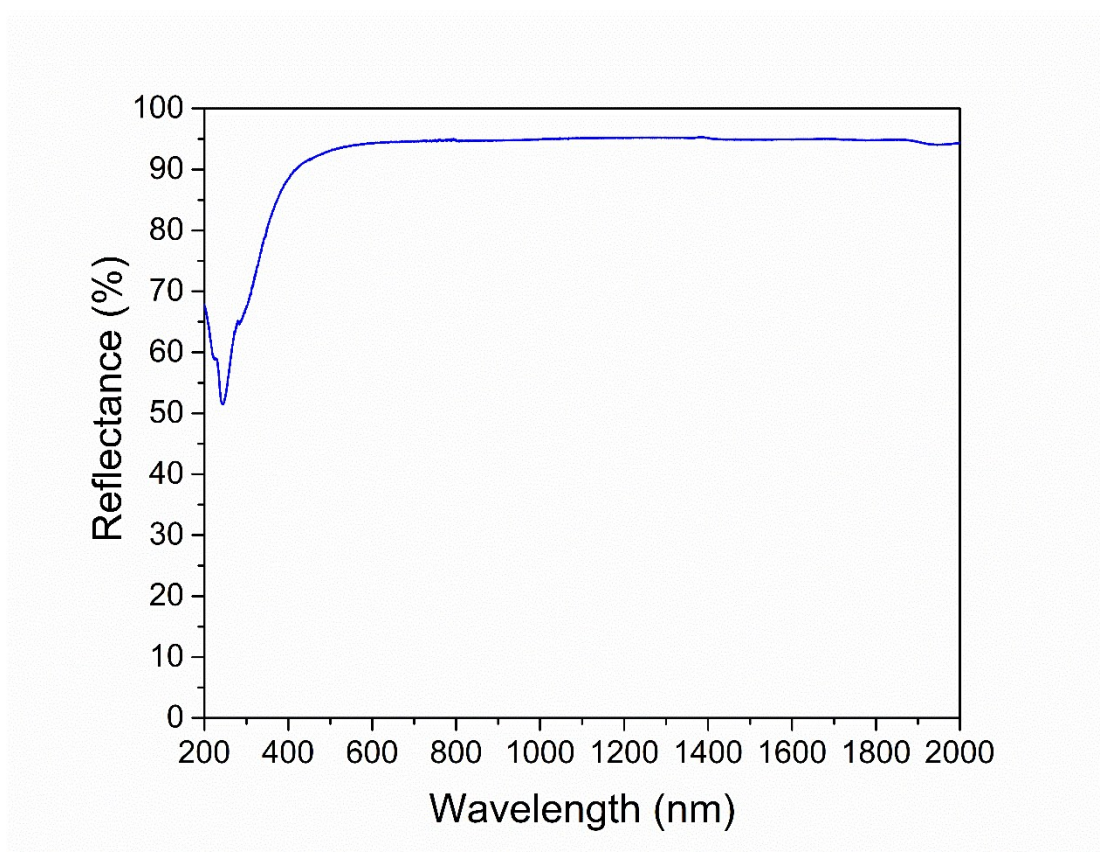

Figure S1. The UV-vis NIR diffuse reflectance spectrum of **LBSBO**.

Table 1. Crystal data and structure refinement for **LBSBO**.

---

|                                         |                                                            |
|-----------------------------------------|------------------------------------------------------------|
| Formula                                 | $\text{Li}_3\text{Ba}_4\text{Sc}_3\text{B}_8\text{O}_{22}$ |
| Weight                                  | 1143.4735                                                  |
| Temperature/K                           | 293(2)                                                     |
| Crystal system                          | triclinic                                                  |
| Space group                             | $P\bar{1}$                                                 |
| a/Å                                     | 9.7959(3)                                                  |
| b/Å                                     | 10.2519(2)                                                 |
| c/Å                                     | 11.5878(3)                                                 |
| $\alpha/^\circ$                         | 85.069(2)                                                  |
| $\beta/^\circ$                          | 68.734(2)                                                  |
| $\gamma/^\circ$                         | 62.795(2)                                                  |
| Volume/Å <sup>3</sup>                   | 960.02(5)                                                  |
| Z                                       | 2                                                          |
| $\rho_{\text{calc}}/\text{cm}^3$        | 3.956                                                      |
| $\mu/\text{mm}^{-1}$                    | 9.178                                                      |
| F(000)                                  | 1024.0                                                     |
| Independent reflections                 | 3921 [ $R_{\text{int}} = 0.0404$ ]                         |
| Data/restraints/parameters              | 3921/0/361                                                 |
| Goodness-of-fit on $F^2$                | 1.066                                                      |
| Final R indexes [ $I \geq 2\sigma(I)$ ] | $R_1 = 0.0196$ , $wR_2 = 0.0490$                           |
| Final R indexes [all data]              | $R_1 = 0.0229$ , $wR_2 = 0.0509$                           |

---

Table 2 Fractional Atomic Coordinates and Equivalent Isotropic Displacement Parameters( $\text{\AA}^2 \times 10^3$ ) for **LBSBO**.

| Atom | x            | y           | z            | U(eq)    |
|------|--------------|-------------|--------------|----------|
| Ba1  | 0.12594 (2)  | 0.80760 (2) | -0.14850 (2) | 8.45(6)  |
| Ba2  | 0.37961 (2)  | 0.69832 (2) | 1.14932 (2)  | 8.47(6)  |
| Ba3  | 0.32855 (3)  | 0.35721 (2) | 0.55353 (2)  | 8.93(6)  |
| Ba4  | 0.19285 (3)  | 1.12431 (2) | 0.43844 (2)  | 9.55(6)  |
| Sc1  | 0.23857 (7)  | 0.74789 (6) | 0.50868 (5)  | 6.59(14) |
| Sc2  | 0.57523 (8)  | 0.70243 (7) | 0.79199 (6)  | 5.34(13) |
| Sc3  | -0.07211 (8) | 0.78925 (7) | 0.21299 (6)  | 5.63(13) |
| O1   | 0.3537 (3)   | 0.4507 (3)  | 0.0847 (2)   | 12.9(5)  |
| O2   | 0.1586 (3)   | 1.0539 (3)  | 0.9051 (2)   | 15.9(6)  |
| O3   | -0.0219 (3)  | 1.1239 (3)  | 0.3434 (2)   | 9.4(5)   |
| O4   | 0.1492 (3)   | 0.8881 (3)  | 0.3883 (2)   | 13.6(6)  |
| O5   | 0.5115 (3)   | 0.8513 (3)  | 0.6578 (2)   | 11.0(5)  |
| O6   | 0.0391 (3)   | 0.9084 (3)  | 0.2328 (2)   | 11.5(5)  |
| O7   | 0.3076 (3)   | 1.0871 (3)  | 0.6404 (2)   | 9.9(5)   |
| O8   | 0.3509 (3)   | 0.8725 (3)  | 0.5364 (2)   | 13.7(5)  |
| O9   | 0.3707 (3)   | 0.8399 (3)  | 0.9412 (2)   | 10.4(5)  |
| O10  | 0.5457 (3)   | 0.3772 (3)  | 0.6408 (2)   | 12.2(5)  |
| O11  | 0.7968 (3)   | 0.5804 (3)  | 0.6400 (2)   | 10.9(5)  |
| O12  | 0.4570 (3)   | 0.5905 (3)  | 0.7696 (2)   | 11.8(5)  |
| O13  | 0.1316 (3)   | 0.6650 (3)  | 0.0608 (2)   | 10.2(5)  |

---

|     |              |            |             |          |
|-----|--------------|------------|-------------|----------|
| O14 | -0.0166 (3)  | 0.6490 (3) | 0.3530 (2)  | 12.9(5)  |
| O15 | 0.3279 (3)   | 0.6035 (3) | 0.6288 (2)  | 15.1(6)  |
| O16 | 0.1152 (3)   | 0.6255 (3) | 0.4985 (2)  | 15.4(6)  |
| O17 | 0.7234 (3)   | 0.7923 (3) | 0.8095 (2)  | 11.5(5)  |
| O18 | 0.2088 (3)   | 0.3138 (3) | -0.1955 (2) | 12.8(5)  |
| O19 | 0.5808 (3)   | 1.0559 (3) | 0.8212 (2)  | 17.9(6)  |
| O20 | 0.0418 (3)   | 0.5761 (3) | -0.1523 (2) | 15.0(6)  |
| O21 | 0.2489 (3)   | 1.0770 (3) | 1.0568 (2)  | 12.4(5)  |
| O22 | 0.2478 (3)   | 0.4322 (3) | -0.0591 (2) | 11.5(5)  |
| B1  | 0.0538 (4)   | 0.9727 (4) | 0.3221 (3)  | 5.5(7)   |
| B2  | 0.3876 (5)   | 0.9362 (4) | 0.6134 (3)  | 7.2(8)   |
| B3  | 0.2656 (5)   | 0.9840 (4) | 0.9643 (4)  | 8.2(8)   |
| B4  | 0.2392 (5)   | 0.5214 (4) | 0.0320 (4)  | 7.5(8)   |
| B5  | 0.4448 (5)   | 0.5251 (4) | 0.6785 (3)  | 6.8(8)   |
| B6  | 0.1570 (5)   | 0.4475 (4) | -0.1372 (3) | 7.5(8)   |
| B7  | 0.1012 (5)   | 0.5670 (4) | 0.4030 (4)  | 7.6(8)   |
| B8  | 0.6739 (5)   | 0.9325 (4) | 0.8562 (3)  | 9.8(8)   |
| Li1 | -0.1855 (9)  | 0.7123 (8) | -0.0482 (7) | 27.9(17) |
| Li2 | 0.4030 (9)   | 1.1079 (9) | 0.7685 (7)  | 29.1(17) |
| Li3 | -0.0604 (11) | 0.6012 (9) | -0.2768 (8) | 39(2)    |

---

Table 3. Atomic displacement parameters of **LBSBO** ( $\text{\AA}^2$ ).

---

| atom | $U_{11}$     | $U_{22}$     | $U_{33}$     | $U_{12}$     | $U_{13}$     | $U_{23}$     |
|------|--------------|--------------|--------------|--------------|--------------|--------------|
| Ba1  | 0.00922 (11) | 0.00696 (11) | 0.00831 (11) | -0.00242 (9) | -0.00401 (8) | 0.00086 (8)  |
| Ba2  | 0.00947 (11) | 0.00654 (11) | 0.00788 (11) | -0.00213 (9) | -0.00359 (8) | 0.00064 (8)  |
| Ba3  | 0.01014 (11) | 0.00846 (11) | 0.01011 (11) | -0.00477 (9) | -0.00506 (8) | 0.00100 (8)  |
| Ba4  | 0.01111 (11) | 0.01063 (11) | 0.01016 (11) | -0.00642 (9) | -0.00557 (8) | 0.00172 (8)  |
| Sc1  | 0.0065 (3)   | 0.0041 (3)   | 0.0089 (3)   | -0.0002 (3)  | -0.0053 (3)  | -0.0012 (2)  |
| Sc2  | 0.0057 (3)   | 0.0045 (3)   | 0.0060 (3)   | -0.0018 (3)  | -0.0029 (2)  | -0.0002 (2)  |
| Sc3  | 0.0057 (3)   | 0.0046 (3)   | 0.0068 (3)   | -0.0016 (3)  | -0.0032 (2)  | -0.0005 (2)  |
| O1   | 0.0162 (13)  | 0.0102 (12)  | 0.0137 (12)  | -0.0043 (11) | -0.0094 (11) | 0.0019 (10)  |
| O2   | 0.0206 (14)  | 0.0102 (13)  | 0.0184 (13)  | -0.0030 (11) | -0.0139 (11) | 0.0014 (10)  |
| O3   | 0.0097 (12)  | 0.0077 (12)  | 0.0092 (11)  | -0.0018 (10) | -0.0047 (10) | 0.0005 (9)   |
| O4   | 0.0176 (14)  | 0.0104 (12)  | 0.0130 (12)  | -0.0027 (11) | -0.0107 (11) | 0.0016 (10)  |
| O5   | 0.0087 (12)  | 0.0115 (12)  | 0.0120 (12)  | -0.0022 (10) | -0.0063 (10) | 0.0021 (10)  |
| O6   | 0.0122 (13)  | 0.0098 (12)  | 0.0153 (12)  | -0.0048 (10) | -0.0076 (10) | -0.0021 (10) |
| O7   | 0.0096 (12)  | 0.0062 (12)  | 0.0103 (11)  | -0.0010 (10) | -0.0027 (10) | -0.0015 (9)  |
| O8   | 0.0131 (13)  | 0.0091 (12)  | 0.0216 (13)  | -0.0045 (11) | -0.0096 (11) | -0.0002 (10) |
| O9   | 0.0113 (12)  | 0.0065 (12)  | 0.0084 (11)  | -0.0010 (10) | -0.0024 (10) | 0.0007 (9)   |
| O10  | 0.0130 (13)  | 0.0087 (12)  | 0.0114 (12)  | 0.0001 (10)  | -0.0065 (10) | -0.0024 (9)  |
| O11  | 0.0085 (12)  | 0.0079 (12)  | 0.0103 (11)  | 0.0013 (10)  | -0.0027 (10) | -0.0040 (9)  |
| O12  | 0.0129 (13)  | 0.0106 (12)  | 0.0165 (13)  | -0.0057 (11) | -0.0097 (11) | 0.0000 (10)  |
| O13  | 0.0098 (12)  | 0.0072 (12)  | 0.0080 (11)  | -0.0011 (10) | -0.0006 (10) | -0.0010 (9)  |

---



---

|     |             |             |             |              |              |              |
|-----|-------------|-------------|-------------|--------------|--------------|--------------|
| O14 | 0.0131 (13) | 0.0115 (13) | 0.0135 (12) | -0.0041 (11) | -0.0070 (10) | 0.0047 (10)  |
| O15 | 0.0183 (14) | 0.0095 (12) | 0.0185 (13) | -0.0006 (11) | -0.0148 (11) | -0.0010 (10) |
| O16 | 0.0169 (14) | 0.0062 (12) | 0.0291 (15) | -0.0028 (11) | -0.0173 (12) | -0.0020 (11) |
| O17 | 0.0126 (13) | 0.0130 (13) | 0.0124 (12) | -0.0075 (11) | -0.0056 (10) | -0.0016 (10) |
| O18 | 0.0111 (13) | 0.0126 (13) | 0.0157 (12) | -0.0047 (11) | -0.0058 (10) | -0.0031 (10) |
| O19 | 0.0260 (15) | 0.0129 (13) | 0.0275 (15) | -0.0117 (12) | -0.0210 (13) | 0.0080 (11)  |
| O20 | 0.0185 (14) | 0.0107 (13) | 0.0227 (14) | -0.0075 (11) | -0.0143 (11) | 0.0043 (10)  |
| O21 | 0.0140 (13) | 0.0102 (12) | 0.0153 (12) | -0.0029 (11) | -0.0108 (11) | -0.0014 (10) |
| O22 | 0.0107 (13) | 0.0095 (12) | 0.0132 (12) | -0.0006 (10) | -0.0074 (10) | -0.0046 (10) |
| B1  | 0.0031 (17) | 0.0073 (18) | 0.0065 (17) | -0.0042 (15) | -0.0001 (14) | 0.0023 (14)  |
| B2  | 0.0063 (18) | 0.0047 (17) | 0.0090 (18) | -0.0025 (15) | -0.0007 (15) | -0.0012 (14) |
| B3  | 0.0090 (19) | 0.0081 (18) | 0.0078 (17) | -0.0047 (16) | -0.0023 (15) | 0.0013 (14)  |
| B4  | 0.0089 (19) | 0.0059 (18) | 0.0082 (18) | -0.0057 (16) | -0.0007 (15) | 0.0012 (14)  |
| B5  | 0.0079 (19) | 0.0053 (18) | 0.0058 (17) | -0.0039 (15) | 0.0000 (14)  | 0.0000 (14)  |
| B6  | 0.0088 (19) | 0.0094 (18) | 0.0078 (17) | -0.0074 (16) | -0.0029 (15) | 0.0038 (14)  |
| B7  | 0.0066 (18) | 0.0069 (18) | 0.0090 (18) | -0.0046 (15) | -0.0010 (14) | 0.0031 (14)  |
| B8  | 0.0112 (19) | 0.015 (2)   | 0.0067 (17) | -0.0087 (17) | -0.0026 (15) | -0.0003 (15) |
| Li1 | 0.029 (4)   | 0.018 (4)   | 0.046 (4)   | -0.013 (3)   | -0.024 (4)   | 0.015 (3)    |
| Li2 | 0.022 (4)   | 0.033 (4)   | 0.032 (4)   | -0.009 (3)   | -0.016 (3)   | 0.005 (3)    |
| Li3 | 0.032 (5)   | 0.026 (4)   | 0.055 (5)   | 0.006 (4)    | -0.034 (4)   | -0.009 (4)   |

---

Table 4. Bond lengths and bond angles of **LBSBO**.

|                         |           |                        |           |
|-------------------------|-----------|------------------------|-----------|
| Ba1—O3 <sup>i</sup>     | 2.716 (2) | Li1—O17 <sup>xv</sup>  | 2.085 (8) |
| Ba1—O13                 | 2.727 (2) | Li1—O20                | 1.965 (8) |
| Ba1—O12 <sup>ii</sup>   | 2.811 (2) | Li2—O2                 | 2.618     |
| Ba1—O2 <sup>ii</sup>    | 2.831 (3) | Li2—O18 <sup>xvi</sup> | 2.038 (8) |
| Ba1—O20                 | 2.854 (3) | Li2—O7                 | 2.089 (8) |
| Ba1—O15 <sup>ii</sup>   | 2.897 (3) | Li2—O19                | 1.886 (8) |
| Ba1—O6 <sup>i</sup>     | 2.897 (2) | Li2—O5                 | 2.595 (9) |
| Ba1—O2 <sup>iii</sup>   | 3.018 (3) | Li3—O11 <sup>xv</sup>  | 2.054 (9) |
| Ba1—O21 <sup>iii</sup>  | 3.070 (3) | Li3—O17 <sup>xv</sup>  | 2.081 (8) |
| Ba1—O9 <sup>ii</sup>    | 3.088 (3) | Li3—O14 <sup>xii</sup> | 2.463 (9) |
| Ba2—O9                  | 2.714 (2) | Li3—O20                | 1.975 (8) |
| Ba2—O10 <sup>iv</sup>   | 2.738 (2) | B1—O3                  | 1.377 (4) |
| Ba2—O19 <sup>v</sup>    | 2.785 (3) | B1—O4                  | 1.371 (4) |
| Ba2—O1 <sup>vi</sup>    | 2.850 (3) | B1—O6                  | 1.356 (5) |
| Ba2—O6 <sup>vi</sup>    | 2.855 (2) | B2—O5                  | 1.380 (4) |
| Ba2—O1 <sup>vii</sup>   | 2.904 (3) | B2—O8                  | 1.378 (5) |
| Ba2—O12 <sup>iv</sup>   | 2.914 (2) | B3—O2                  | 1.354 (5) |
| Ba2—O4 <sup>vi</sup>    | 2.988 (2) | B3—O9                  | 1.338 (5) |
| Ba2—O22 <sup>vii</sup>  | 3.035 (2) | B3—O21                 | 1.412 (5) |
| Ba2—O13 <sup>vi</sup>   | 3.114 (3) | B4—O1                  | 1.354 (5) |
| Ba3—O15                 | 2.737 (3) | B4—O13                 | 1.341 (5) |
| Ba3—O10                 | 2.754 (3) | B4—O22                 | 1.410 (5) |
| Ba3—O16                 | 2.784 (2) | B5—O10                 | 1.377 (4) |
| Ba3—O8 <sup>vii</sup>   | 2.789 (3) | B5—O12                 | 1.365 (5) |
| Ba3—O18 <sup>vi</sup>   | 2.795 (2) | B5—O15                 | 1.359 (5) |
| Ba3—O11 <sup>vii</sup>  | 2.824 (2) | B6—O18                 | 1.366 (5) |
| Ba3—O5 <sup>vii</sup>   | 2.841 (2) | B6—O20                 | 1.336 (5) |
| Ba3—O14 <sup>viii</sup> | 2.878 (3) | B6—O22                 | 1.438 (5) |
| Ba3—O7 <sup>ix</sup>    | 2.935 (2) | B7—O11 <sup>vii</sup>  | 1.385 (5) |
| Ba4—O3                  | 2.707 (3) | B7—O14                 | 1.375 (5) |
| Ba4—O8                  | 2.733 (2) | B7—O14                 | 1.375 (5) |
| Ba4—O4                  | 2.784 (3) | B7—O16                 | 1.378 (5) |
| Ba4—O16 <sup>iii</sup>  | 2.804 (3) | B8—O17                 | 1.377 (5) |
| Ba4—O5 <sup>x</sup>     | 2.823 (3) | B8—O19                 | 1.312 (5) |
| Ba4—O17 <sup>x</sup>    | 2.858 (2) | B8—O21 <sup>v</sup>    | 1.438 (5) |
| Ba4—O7                  | 2.872 (2) | O6—B1—O4               | 120.3 (3) |
| Ba4—O14 <sup>iii</sup>  | 2.914 (3) | O6—B1—O3               | 120.1 (3) |
| Ba4—O11 <sup>x</sup>    | 3.121 (2) | O4—B1—O3               | 119.6 (3) |
| Ba4—O19 <sup>x</sup>    | 3.123 (3) | O8—B2—O7               | 120.0 (3) |
| Sc1—O4                  | 2.041 (2) | O8—B2—O5               | 120.6 (3) |
| Sc1—O15                 | 2.059 (2) | O7—B2—O5               | 119.3 (3) |
| Sc1—O10 <sup>vii</sup>  | 2.088 (2) | O9—B3—O2               | 123.3 (3) |

|                        |           |                           |           |
|------------------------|-----------|---------------------------|-----------|
| Sc1—O3 <sup>iii</sup>  | 2.090 (2) | O9—B3—O21                 | 123.6 (3) |
| Sc1—O8                 | 2.135 (3) | O2—B3—O21                 | 113.1 (3) |
| Sc1—O16                | 2.137 (3) | O13—B4—O1                 | 122.7 (3) |
| Sc2—O12                | 2.052 (3) | O13—B4—O22                | 123.2 (3) |
| Sc2—O9                 | 2.078 (2) | O1—B4—O22                 | 114.0 (3) |
| Sc2—O1 <sup>vii</sup>  | 2.080 (2) | O15—B5—O12                | 120.3 (3) |
| Sc2—O17                | 2.114 (3) | O15—B5—O10                | 119.5 (3) |
| Sc2—O11                | 2.122 (2) | O12—B5—O10                | 120.1 (3) |
| Sc2—O5                 | 2.136 (2) | O20—B6—O18                | 125.6 (3) |
| Sc3—O6                 | 2.044 (3) | O20—B6—O22                | 123.9 (3) |
| Sc3—O13                | 2.055 (2) | O18—B6—O22                | 110.5 (3) |
| Sc3—O2 <sup>iii</sup>  | 2.096 (2) | O14—B7—O16                | 121.9 (3) |
| Sc3—O18 <sup>xii</sup> | 2.116 (3) | O14—B7—O11 <sup>vii</sup> | 118.8 (3) |
| Sc3—O14                | 2.126 (2) | O16—B7—O11 <sup>vii</sup> | 119.3 (3) |
| Sc3—O7 <sup>iii</sup>  | 2.161 (2) | O19—B8—O17                | 126.1 (3) |
| Li1—O21 <sup>iii</sup> | 1.960 (7) | O19—B8—O21 <sup>v</sup>   | 124.7 (3) |
| Li1—O22 <sup>xii</sup> | 2.018 (7) | O17—B8—O21 <sup>v</sup>   | 109.1 (3) |

Symmetry codes: (i)  $-x, -y+2, -z$ ; (ii)  $x, y, z-1$ ; (iii)  $-x, -y+2, -z+1$ ; (iv)  $-x+1, -y+1, -z+2$ ; (v)  $-x+1, -y+2, -z+2$ ;

(vi)  $x, y, z+1$ ; (vii)  $-x+1, -y+1, -z+1$ ; (viii)  $-x, -y+1, -z+1$ ; (ix)  $x, y-1, z$ ; (x)  $-x+1, -y+2, -z+1$ ; (xi)  $x+1, y, z+1$ ;

(xii)  $-x, -y+1, -z$ ; (xiii)  $x, y+1, z$ ; (xiv)  $x, y-1, z-1$ ; (xv)  $x-1, y, z-1$ ; (xvi)  $x, y+1, z+1$ .

Table S5. The BVS of **LBSBO**.

| Atom | BVS    | Atom | BVS    |
|------|--------|------|--------|
| Ba1  | 2.116  | O3   | 2.1571 |
| Ba2  | 2.1181 | O4   | 2.0915 |
| Ba3  | 2.2361 | O5   | 1.959  |
| Ba4  | 2.2289 | O6   | 2.0527 |
| Li1  | 0.9499 | O7   | 1.9913 |
| Li2  | 0.7799 | O8   | 2.0162 |
| Li3  | 0.7731 | O9   | 2.0746 |
| Sc1  | 3.1501 | O10  | 2.1029 |
| Sc2  | 3.101  | O11  | 2.001  |
| Sc3  | 3.0876 | O12  | 2.0342 |
| B1   | 3.025  | O13  | 2.0813 |
| B2   | 2.9365 | O14  | 1.9318 |
| B3   | 3.0349 | O15  | 2.1029 |
| B4   | 3.031  | O16  | 2.0108 |
| B5   | 3.0329 | O17  | 2.0796 |
| B6   | 2.9475 | O18  | 1.979  |
| B7   | 2.9342 | O19  | 1.8702 |
| B8   | 2.991  | O20  | 1.8392 |
| O1   | 2.0031 | O21  | 2.1233 |
| O2   | 1.9872 | O22  | 2.1019 |

## References

- (1) Sheldrick, G. SHELXS-97, Program for crystal structure solution; *University of Göttingen: Göttingen, Germany, 1997.*
